# Supplementary material for: Synthesis, Anticancer Activity, and Apoptosis Induction of Novel 3,6-Diazaphenothiazines
Source: PubMed Central journal article supplement (PMC6359424; doi:10.3390/molecules24020267), 2019-01-12
Supplement: molecules-24-00267-s001.pdf [file molecules-24-00267-s001.pdf]

# Supplementary Material

## SYNTHESIS, ANTICANCER ACTIVITY AND APOPTOSIS INDUCTION OF NOVEL 3,6-DIAZAPHENOTHIAZINES #

Beata Morak-Młodawska<sup>1\*</sup>, Krystian Pluta<sup>1</sup>, Małgorzata Latocha<sup>2</sup>, Małgorzata Jeleń<sup>1</sup>,

Dariusz Kuśmierz<sup>2</sup>

<sup>1</sup>The Medical University of Silesia, School of Pharmacy with the Division of Laboratory Medicine, Department of Organic Chemistry, Jagiellońska 4, 41-200 Sosnowiec, Poland,

<sup>2</sup>The Medical University of Silesia, School of Pharmacy with the Division of Laboratory Medicine, Department of Cell Biology, Jedności 8, 41-200 Sosnowiec, Poland.

|                                                                                                                            |   |
|----------------------------------------------------------------------------------------------------------------------------|---|
| Content                                                                                                                    | 1 |
| 1. <sup>1</sup> H NMR of the most active compound 10-[4-(N,N-diethyl)amino-but-2-ynyl]-3,6-diazaphenothiazine ( <b>4</b> ) | 2 |
| 2. <sup>1</sup> H NMR of the compound ( <b>4</b> ) – aliphatic part                                                        | 3 |
| 3. <sup>1</sup> H NMR of the compound ( <b>4</b> ) – aromatic part                                                         | 4 |
| 4. <sup>13</sup> C NMR of the compound ( <b>4</b> )                                                                        | 5 |
| 5. <sup>13</sup> C NMR of the compound ( <b>4</b> ) – aromatic part                                                        | 6 |
| 6. <sup>13</sup> C NMR of the compound ( <b>4</b> ) – aliphatic part                                                       | 7 |
| 7. FAB MS of the compound ( <b>4</b> )                                                                                     | 8 |
| 8. HR MS of the compound ( <b>4</b> )                                                                                      | 9 |

1. <sup>1</sup>H NMR of the most active compound 10-[4-(N,N-diethyl)amino-but-2-ynyl]-3,6-diazaphenothiazine (4)

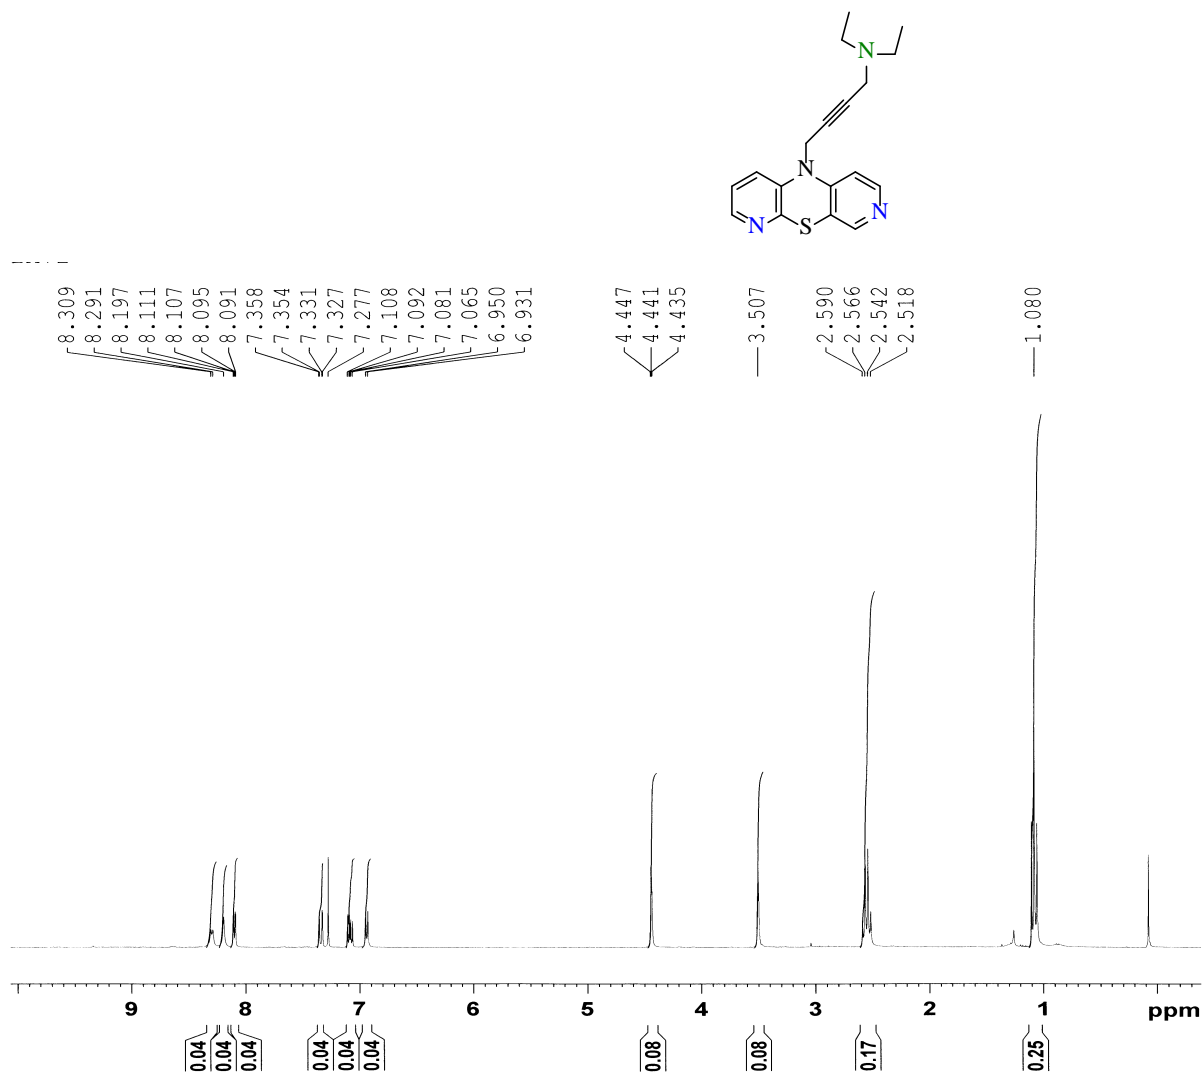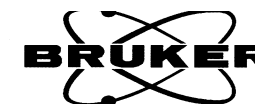

```

Current Data Parameters
NAME           BM72
EXPNO          1
PROCNO         1

F2 - Acquisition Parameters
Date_          20140509
Time           12.35
INSTRUM        FOURIER300
PROBHD         5 mm DUL BB-1H
PULPROG        zg30
TD             65536
SOLVENT        CDCl3
NS             16
DS             2
SWH            6103.516 Hz
FIDRES         0.093132 Hz
AQ            5.3687091 sec
RG            31.623
DW            81.920 usec
DE            6.50 usec
TE            294.8 K
D1            1.00000000 sec
TD0           1

===== CHANNEL f1 =====
SFO1          300.1818537 MHz
NUC1           1H
P1            8.50 usec
PLW1          44.00000000 W

F2 - Processing parameters
SI            65536
SF            300.1800000 MHz
WDW           EM
SSB           0
LB            0.30 Hz
GB           0
PC            1.00
    
```

2.  $^1\text{H}$  NMR of the compound (4) – aliphatic part

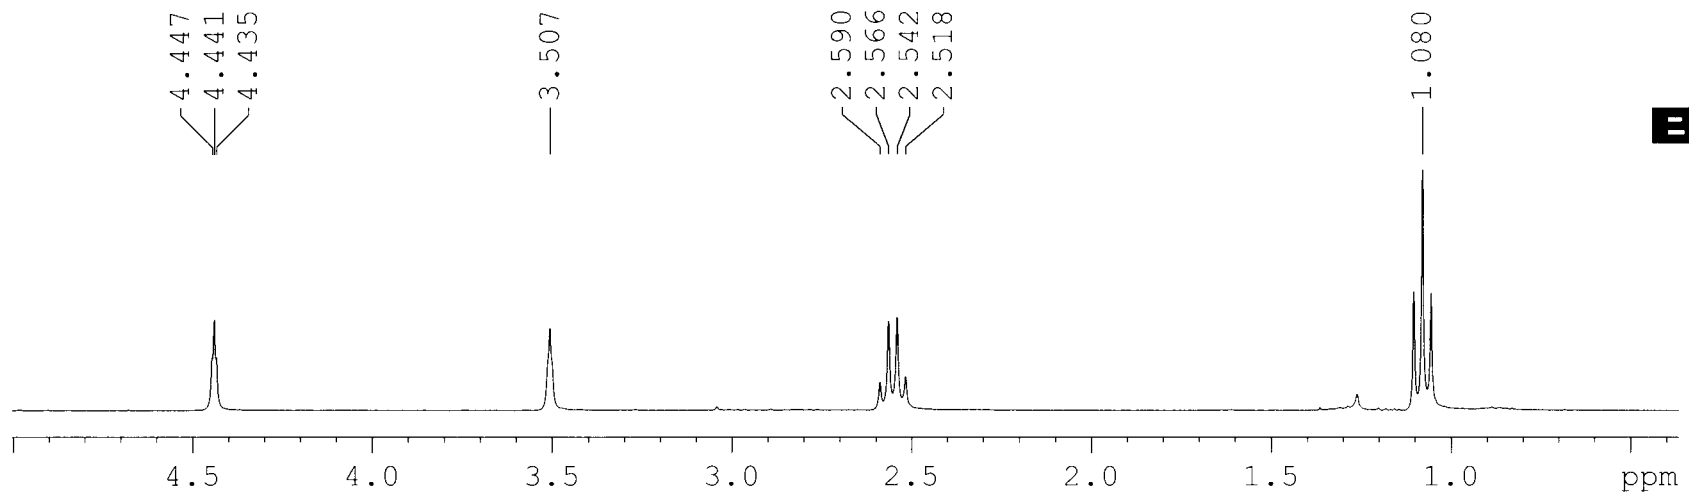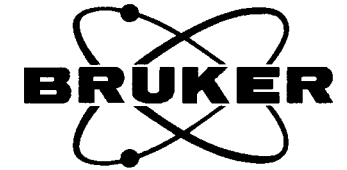

<sup>1</sup>H NMR of the compound (4) – aromatic part

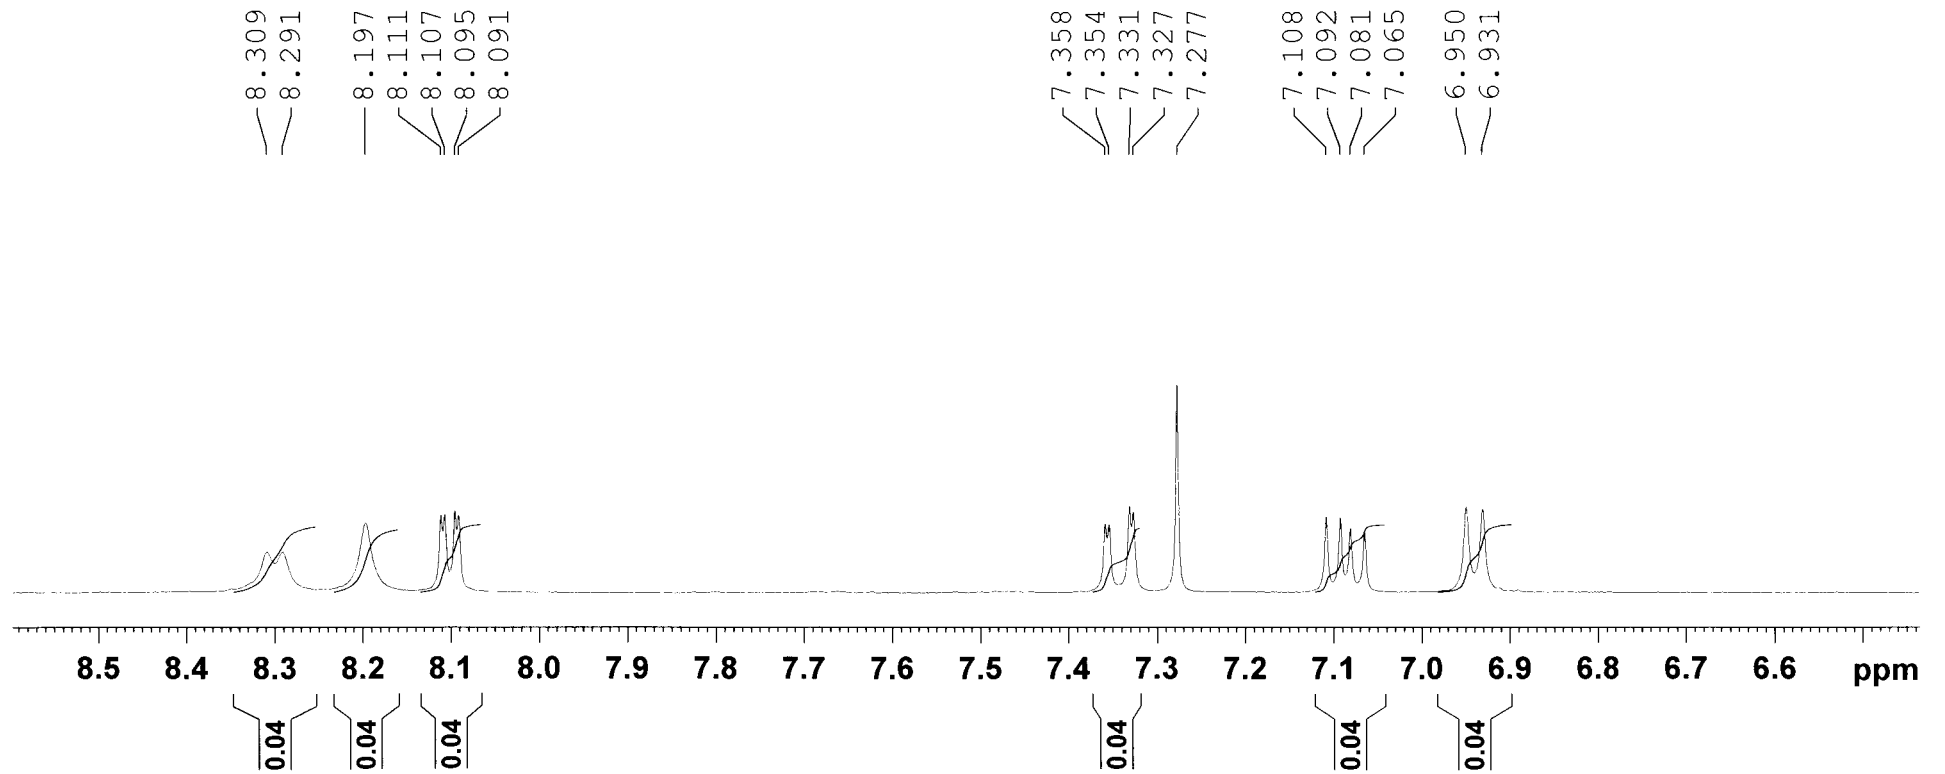

<sup>13</sup>C NMR of the compound (4)

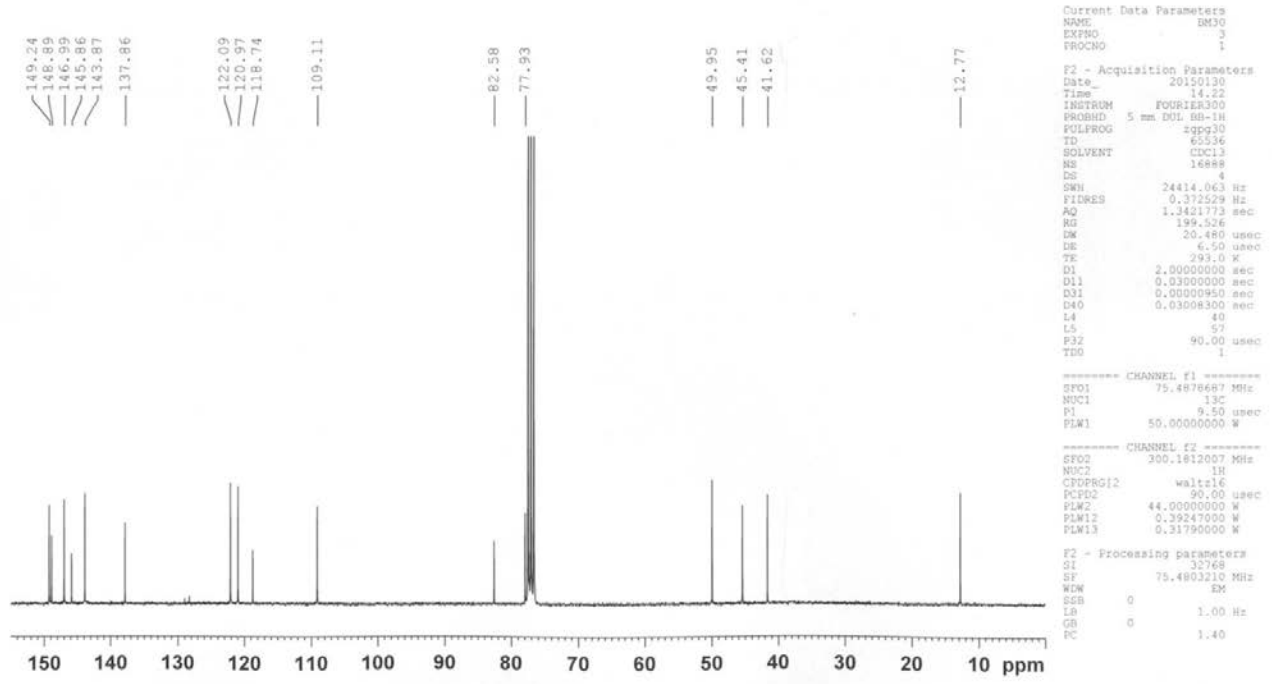

<sup>13</sup>C NMR of the compound (4) – aromatic part

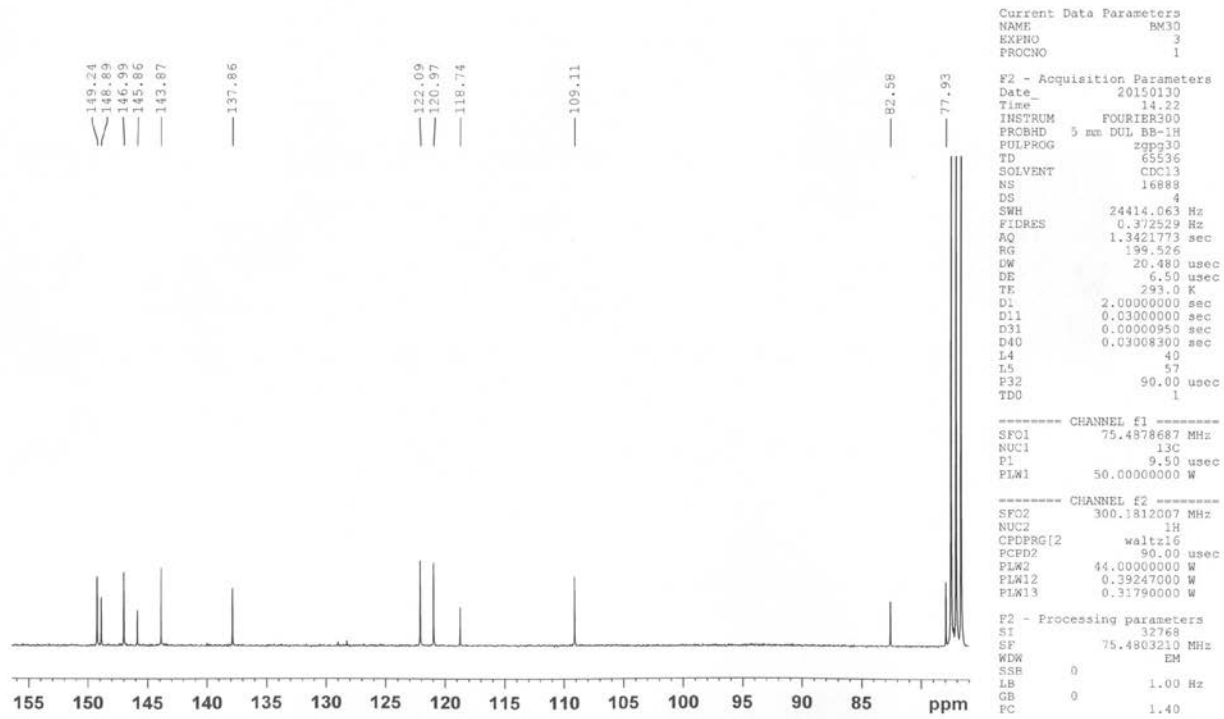

$^{13}\text{C}$  NMR of the compound (4) – aliphatic part

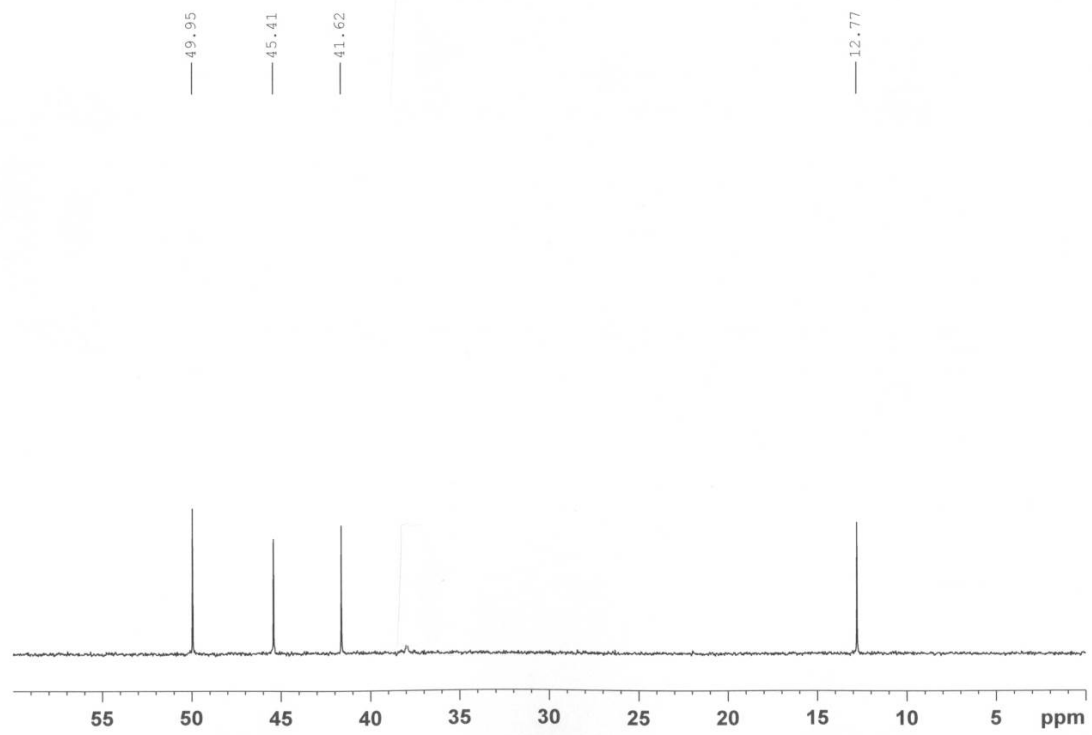

### 3. FAB MS of the compound (4)

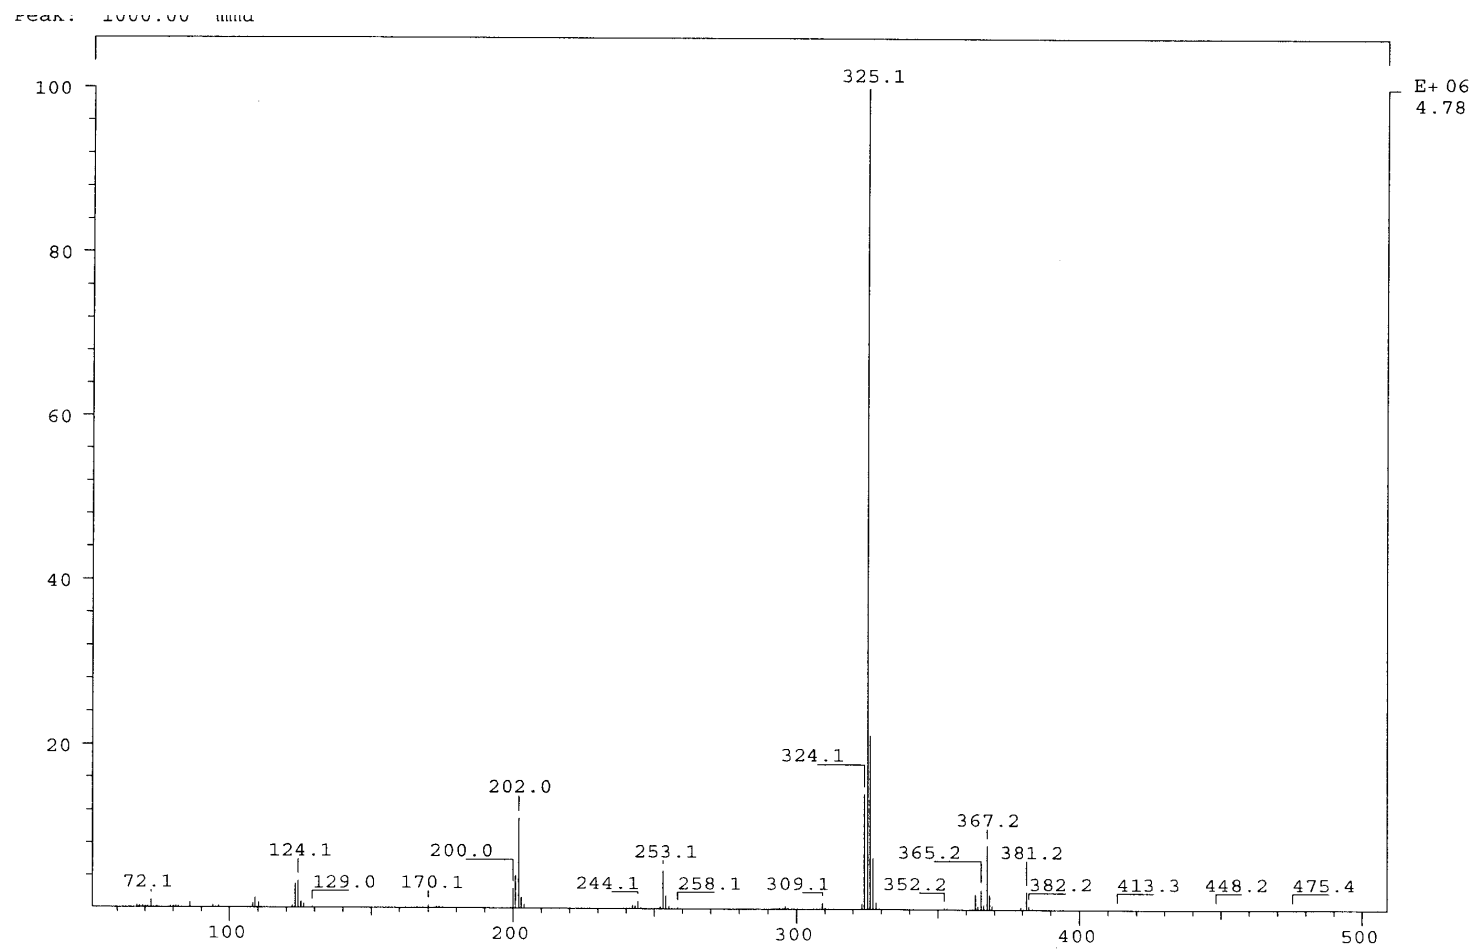



4. HR MS of the compound (4)

## Mass Spectrum List Report

**Analysis Info**

Analysis Name D:\Data\PM\_20171204\BA2.d  
 Method low\_mass.m  
 Sample Name PM\_20171204\_tune\_high\_pos\_before  
 Comment

Acquisition Date 3/21/2018 9:11:51 AM

Operator KM  
 Instrument impact II 1825265.10082

**Acquisition Parameter**

|             |          |                      |          |                  |           |
|-------------|----------|----------------------|----------|------------------|-----------|
| Source Type | ESI      | Ion Polarity         | Positive | Set Nebulizer    | 0.3 Bar   |
| Focus       | Active   | Set Capillary        | 4000 V   | Set Dry Heater   | 240 °C    |
| Scan Begin  | 100 m/z  | Set End Plate Offset | -500 V   | Set Dry Gas      | 4.0 l/min |
| Scan End    | 1000 m/z | Set Charging Voltage | 2000 V   | Set Divert Valve | Source    |
|             |          | Set Corona           | 0 nA     | Set APCI Heater  | 0 °C      |

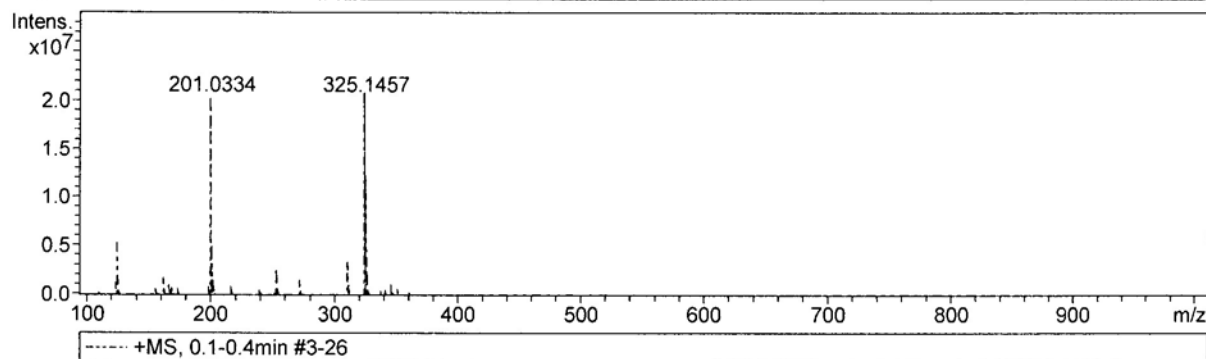

| # | m/z      | Res.  | S/N     | I        | I %   | FWHM   |
|---|----------|-------|---------|----------|-------|--------|
| 1 | 125.1182 | 26297 | 13316.1 | 4857156  | 23.8  | 0.0048 |
| 2 | 163.0758 | 28609 | 3520.9  | 1400232  | 6.9   | 0.0057 |
| 3 | 175.0298 | 26518 | 866.6   | 468366   | 2.3   | 0.0066 |
| 4 | 201.0334 | 15895 | 31412.9 | 20377586 | 100.0 | 0.0126 |
| 5 | 203.0293 | 31294 | 2805.6  | 1809982  | 8.9   | 0.0065 |
| 6 | 254.0718 | 35952 | 4045.7  | 2697730  | 13.2  | 0.0071 |
| 7 | 273.0775 | 34220 | 1820.4  | 1096647  | 5.4   | 0.0080 |
| 8 | 311.1294 | 39115 | 3340.8  | 2909928  | 14.3  | 0.0080 |
| 9 | 325.1457 | 14971 | 22541.4 | 20377596 | 100.0 | 0.0217 |
